# Supplementary figures and images for: αvβ3 Integrin Mediates Radioresistance of Prostate Cancer Cells through Regulation of Survivin
Source: Oxford University Press journal article supplement (doi:10.1158/1541-7786.mcr-18-0544), 2018-09-28

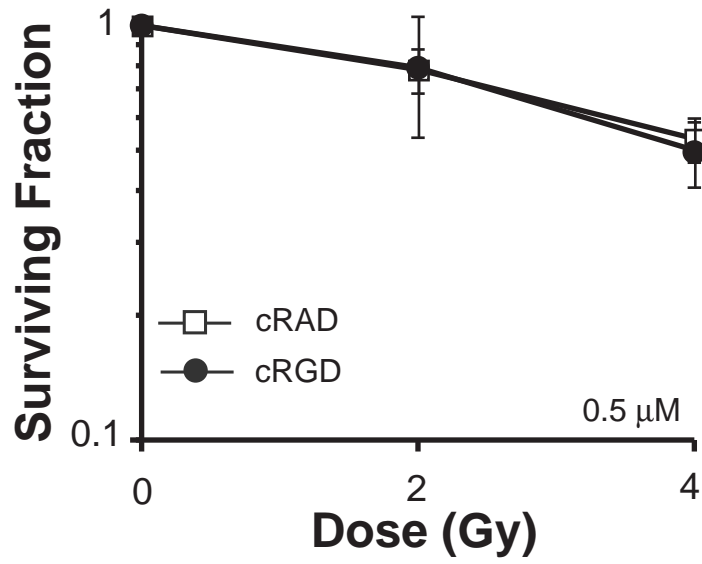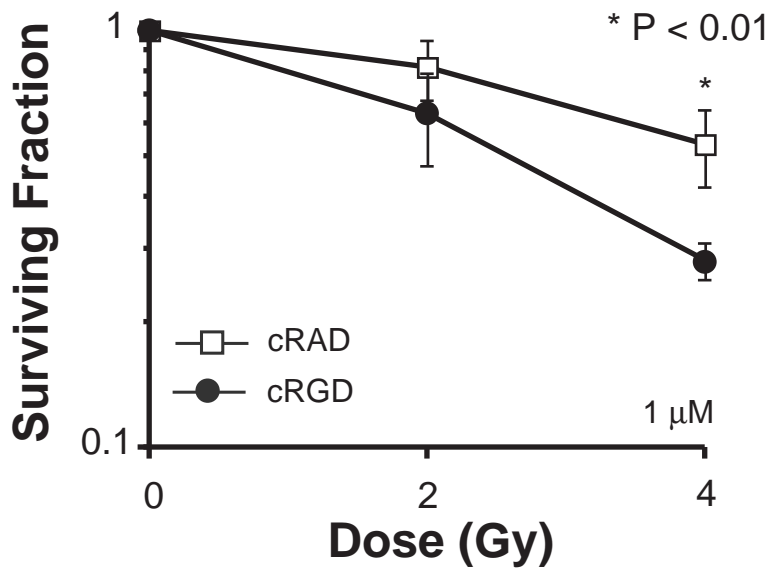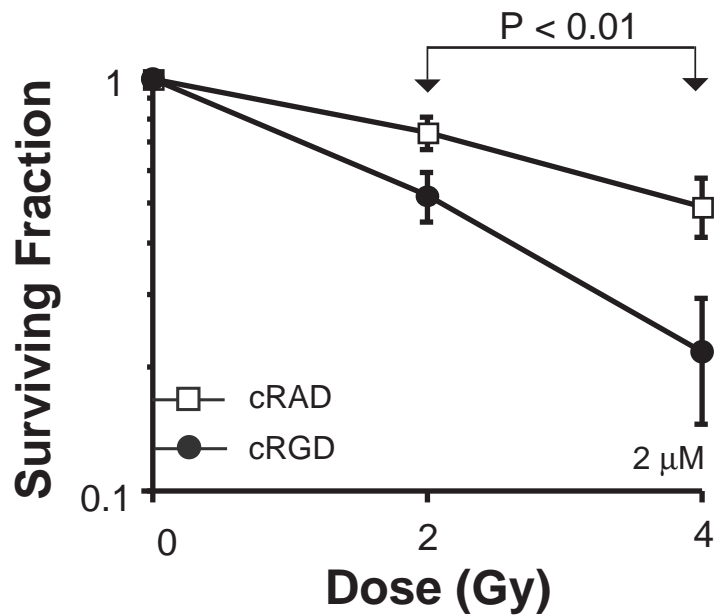

Supplement: 15417786mcr180544-sup-202476_2_supp_4984452_pdxcjk.pdf [file 15417786mcr180544-sup-202476_2_supp_4984452_pdxcjk.pdf]
